## RESEARCH ARTICLE

Evolution of secondary cell number and position in the *Drosophila* accessory glandYoko A. Takashima<sup>1</sup>\*, Alex C. Majane, David J. Begun<sup>1</sup>\*

Department of Evolution and Ecology, University of California, Davis, California, United States of America

\* Current address: Department of Molecular Biology and Genetics, Cornell University, Ithaca, New York, United States of America

\* yt366@cornell.edu (YAT); djbegun@ucdavis.edu (DJB)

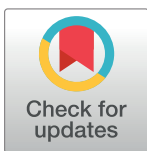

## Abstract

In animals with internal fertilization, males transfer gametes and seminal fluid during copulation, both of which are required for successful reproduction. In *Drosophila* and other insects, seminal fluid is produced in the paired accessory gland (AG), the ejaculatory duct, and the ejaculatory bulb. The *D. melanogaster* AG has emerged as an important model system for this component of male reproductive biology. Seminal fluid proteins produced in the *Drosophila* AG are required for proper storage and use of sperm by the females, and are also critical for establishing and maintaining a suite of short- and long-term postcopulatory female physiological responses that promote reproductive success. The *Drosophila* AG is composed of two main cell types. The majority of AG cells, which are referred to as main cells, are responsible for production of many seminal fluid proteins. A minority of cells, about 4%, are referred to as secondary cells. These cells, which are restricted to the distal tip of the *D. melanogaster* AG, may play an especially important role in the maintenance of the long-term female post-mating response. Many studies of *Drosophila* AG evolution have suggested that the proteins produced in the gland evolve quickly, as does the transcriptome. Here, we investigate the evolution of secondary cell number and position in the AG in a collection of eight species spanning the entire history of the *Drosophila* genus. We document a heretofore underappreciated rapid evolutionary rate for both number and position of these specialized AG cells, raising several questions about the developmental, functional, and evolutionary significance of this variation.

## OPEN ACCESS

**Citation:** Takashima YA, Majane AC, Begun DJ (2023) Evolution of secondary cell number and position in the *Drosophila* accessory gland. PLoS ONE 18(10): e0278811. <https://doi.org/10.1371/journal.pone.0278811>

**Editor:** Arnar Palsson, University of Iceland, ICELAND

**Received:** November 23, 2022

**Accepted:** April 25, 2023

**Published:** October 25, 2023

**Copyright:** © 2023 Takashima et al. This is an open access article distributed under the terms of the [Creative Commons Attribution License](https://creativecommons.org/licenses/by/4.0/), which permits unrestricted use, distribution, and reproduction in any medium, provided the original author and source are credited.

**Data Availability Statement:** within manuscript and/or [Supporting information](#) files.

**Funding:** This work was supported by the National Institutes of Health grant NIGMS R35 GM134930 to David J. Begun and a National Science Foundation Graduate Research Fellowship to Alex C. Majane. The content is solely the responsibility of the authors and does not necessarily represent the official views of the National Institutes of Health. <https://www.nigms.nih.gov/>. The funders had no role in study design, data collection and

## Introduction

Along with sperm, *Drosophila* males transfer seminal fluid proteins (Sfps) to females. Transfer of molecules from male to female provides a fascinating example of male-female co-operation and conflict [1]. Female reproduction requires seminal fluid, yet this requirement exposes females to male adaptations that may subvert their reproductive interests [2–7]. Seminal fluid may also mediate competitive interactions between the sperm of multiple males in the female reproductive tract [8–10]. Significant polymorphism of genes affecting seminal fluid function is evident in the rapid laboratory evolution of male toxicity toward females and the rapid evolution of male sperm displacement phenotypes in experimental populations of *Drosophila*

analysis, decision to publish, or preparation of the manuscript.

**Competing interests:** The authors have declared that no competing interest exist.

*melanogaster* [2, 3, 11]. The outcome of sperm competition is also influenced by female genetic variation and the interaction of genetic variation in the two sexes [12–14]. *Drosophila* Sfps are produced in the accessory gland (AG), ejaculatory duct, and ejaculatory bulb. The molecular products of the seminal fluid producing organs exhibit rapid evolution, as expected given their role in sexual conflict [15, 16] Sfp protein sequences often evolve very quickly [17], sometimes under the influence of directional selection [18–21]. Expression levels of AG-biased genes may vary widely even between closely related populations and species [22–25], and the AG transcriptome exhibits rapid turnover due to gene presence/absence variation [26–28] or the expression of different homologues in the AG of different species [23, 29–31].

In most *Drosophila* species the AG is composed of two major cell types [32]. In *D. melanogaster*, main cells constitute about 96% of the cells, which are the primary producers of the secreted proteins required for fertility, and induce both short- and long-term changes to female post-copulatory physiology and behavior [8, 33–38]. The secondary cells (estimated to be 4% of the cells) are clustered in the distal portion of the organ (reviewed in [39]). Their secreted products appear to play an important role in maintaining female post-copulatory responses [39–41]. Secondary cells (SC) play a role in the secretion of extracellular vesicles (*i. e.*, exosomes), which bind to sperm, interact with the female reproductive tract epithelium, and play a role in the long-term mating response of females [42].

Recent RNA-seq analysis of secondary cells has revealed that their transcriptome is distinct from that of main cells and also evolves in a distinct manner [43, 44]. Given that male reproductive proteins and transcriptomes evolve quickly and that mating systems vary dramatically across *Drosophila* [45], whether most basic conclusions about the AG as described in the *D. melanogaster* model apply generally to *Drosophila* is an open question. A report by [32], which focused on AG main cell binucleation in multiple *Drosophila* species, provided incidental data (their Fig 1) strongly suggesting that *Drosophila* secondary cell number evolves, perhaps quickly. Given their inherent biological interest and relative ease of measurement, we set out to quantitatively investigate secondary cell number variation in a collection of *Drosophila* species.

## Materials and methods

### Fly stocks

*D. melanogaster* RAL 517, RAL 399, RAL 360 [46] (Mackay *et al.* 2012), *D. yakuba* Tai18E2 [47], *D. simulans* *w*<sup>501</sup> [47], *D. hydei*, *D. virilis* (gift of S. Lott, UC Davis), *D. mojavensis* (*Drosophila* Species Stock Center #s 0218.15 and 0218.17), *D. ananassae* 11–4 (gift of B. Cooper, University of Montana), *D. pseudoobscura* SLC 10 (gift of S. Schaeffer, Pennsylvania State University). All stocks were maintained in a 25°C incubator on a 12:12 hr light:dark cycle.

The phylogenetic relationships of these species is depicted in Fig 1. Four of these species (*D. melanogaster*, *D. simulans*, *D. yakuba*, and *D. ananassae*) are from the *melanogaster* group; two (*D. hydei* and *D. mojavensis*) are from the *repleta* group; one (*D. pseudoobscura*) is from the *obscura* group, and one (*D. virilis*) is from the *virilis* group. The species were sampled to provide information about shorter and longer time scale evolutionary change. On a long time-scale, the most recent common ancestor of all eight species existed about 40–50 million years ago [48, 49]. On a shorter timescale, divergence between *D. melanogaster* and *D. simulans* is about 2–3 million years [50]. Three inbred lines of *D. melanogaster* were used to investigate the possibility of genetic variation affecting SC number in this species.

### Dissecting, fixing, and staining glands

Virgin males were collected and then dissected two days after their estimated age of sexual maturity, which varies among species [45]. *D. melanogaster*, *D. simulans*, and *D. yakuba* were

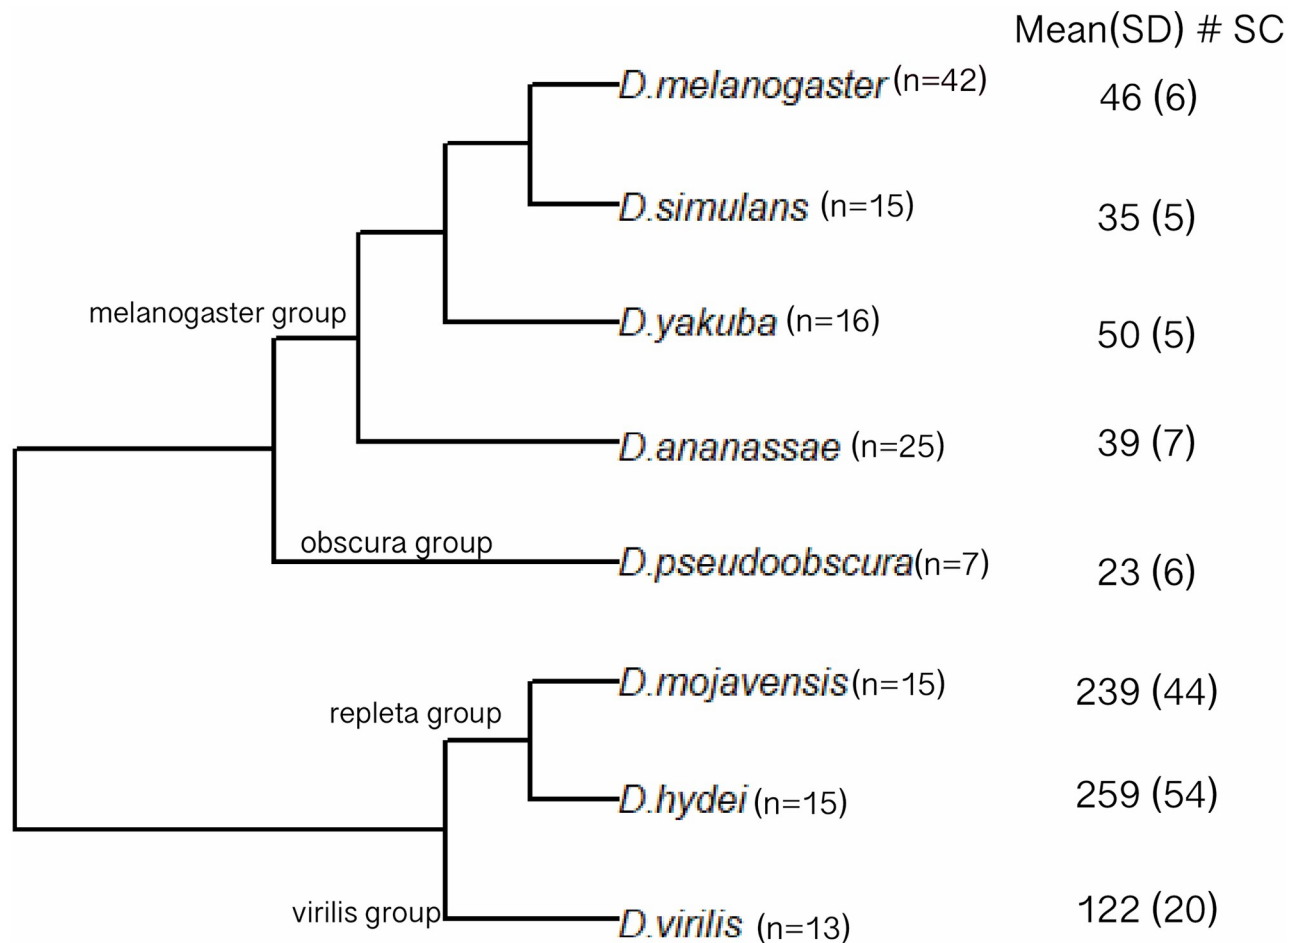

**Fig 1. Estimates of secondary cell number for eight *Drosophila* species.** Phylogeny of eight *Drosophila* species and estimates of secondary cell number for each. Number of glands analyzed for each species are indicated next to the species name; mean and standard deviation of secondary cell number per species are shown to the right.

<https://doi.org/10.1371/journal.pone.0278811.g001>

dissected two days post-eclosion. *D. hydei* were dissected 10 days post eclosion. *D. mojavensis*, *D. pseudoobscura*, *D. ananassae*, and *D. virilis* were dissected eight days post eclosion.

Dissected accessory glands were fixed in 4% paraformaldehyde for 30 minutes at room temperature, and then washed with 1X PBS. The glands were treated with a 1:100 dilution of 10mg/ml RNase in PBT for 30 minutes at room temperature and stained using propidium iodide at a concentration of 1:1000 for 30 minutes at room temperature [32]. Glands were then mounted on glass slides with spacers—Scotch tape layered and cut into squares that would mark where the corners of the 0.5mm coverslip would lie. Spacers were necessary to prevent compression of the gland. One gland of the two was imaged using a Leica confocal microscope at 20X (dry) and 40X (oil) magnification with 75–100 z-stacks per gland. The Z step size was approximately 1.8–2.0 $\mu$ m. Images were stitched together using the Pairwise Stitching of Images [51] or were merged at the Leica confocal upon image acquisition using the tilescan function with 10% overlap.

### Secondary cell quantification

Due to the nature of the propidium iodide staining and the structure of the cell itself, SCs were easily distinguished from main cells by their characteristic large, dark vacuoles (Fig 3). SCs

were counted manually across z-stack images using the Cell Counter Plugin in FIJI [52]. After initializing a .tif file in this plugin, the “show all” function allowed us to track and count each SC throughout the z plane. Two arbitrary counters, which were conveniently different colors, were used to tally the different secondary cells to properly ensure that double counting did not occur. One counter tracked one side of the epithelial layer, and after going through the lumen of the gland; the second counter was used to track cells on the other epithelial layer. The plugin then tallied the number of times the counter was used. Totals from the two counters were summed to estimate the number of secondary cells in a gland. Distinguishing between each epithelial layer was possible due to the spacers on the slide to prevent the compression of the tissue.

### Accessory gland length and area

AG gland measurements were done using FIJI [52]. Gland length measurements were done by using the freehand tool and drawing a line directly down the middle of the gland spanning from the top of the ejaculatory duct and the tip of the gland. The measurements were taken in pixels following [53, 54]. AG area was estimated by using the lasso tool on FIJI to draw perimeters around the glands, after which, measurements were made and the area in microns generated following [53, 54].

### Statistics and phylogeny

Statistics were done using R version 4.2.2; R Core Team 2020 /Rstudio version 2022.02.3 Build 492. "Prairie Trillium" Release (1db809b8, 2022-05-20) for Windows [55]. For ANOVA and Tukey's Honest Significant Difference Test, the package 'multcomp' was used [56]. Violin plots were created using ggplot2 version 3.4 [57]. The phylogeny was constructed using package 'ape' version 5.6.2 in R/Rstudio [58].

## Results and discussion

Fig 1 presents our estimates of SC number in eight species. Previous estimates of SC number in *D. melanogaster* were roughly 43 SC per gland [59]. Our results provide a similar, though slightly greater estimate of SC number per gland, and also provide a quantitative measure of variation among genotypes. The three *D. melanogaster* inbred lines we assayed, which originated in Raleigh, North Carolina [46], were not significantly heterogeneous for SC number (S1 Fig). Thus, while there may be genetic variation for SC number currently segregating in *D. melanogaster*, we observed no evidence for this in our small sample. It is worth noting that a range of SC numbers were observed within each inbred RAL genotype (e.g., for RAL 517 the range across individuals was 29 to 56). While some of this variation could represent measurement error, developmental variation in the process leading to SC differentiation could also contribute. *D. simulans*, the sister species to *D. melanogaster*, had significantly fewer SC (Figs 1 and 2). This provides strong evidence that SC numbers can evolve substantially, even on short timescales. Of course, the observation of species differences provides *prima facie* evidence for genetic variation affecting SC number. While our estimate of *D. yakuba* SC number is greater than the estimates from *D. melanogaster* and *D. simulans*, it is not significantly different from *D. melanogaster*. Thus, the most parsimonious explanation for the observed variation in SC number in the *melanogaster* subgroup is a recent decrease in SC number in *D. simulans*. All samples from the three *melanogaster* subgroup species exhibited the well documented spatial patterning previously observed in *D. melanogaster*, with all SC distributed in the distal tip of the gland (Fig 3).

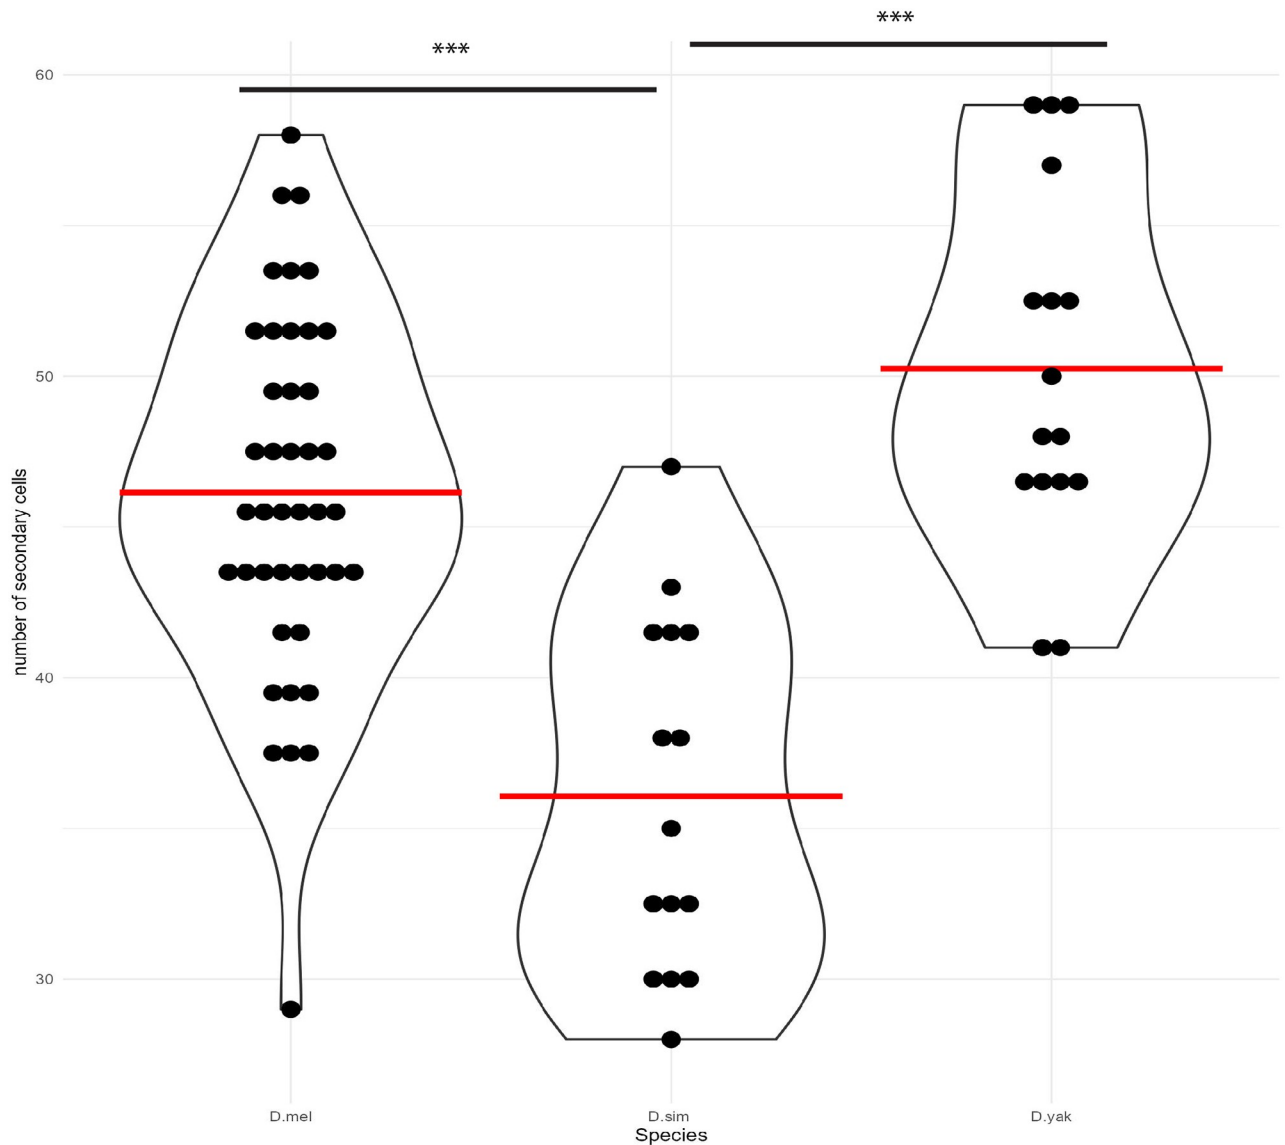

**Fig 2. Summary of secondary cell number across the *Melanogaster* subgroup.** Violin plot showing distributions of number of secondary cells in each species. Red bar = mean. Asterisks indicate p-values from ANOVA. \* < 0.05, \*\* < 0.01, \*\*\* < 0.001.

<https://doi.org/10.1371/journal.pone.0278811.g002>

*D. ananassae* is the nearest outgroup for the *melanogaster* subgroup in our sample. *D. ananassae* mean SC number was significantly lower than the mean for the *melanogaster* subgroup (Fig 2), but without formal phylogenetic modeling of the trait we cannot infer the ancestral SC number of the *melanogaster* group and thus the direction of evolution in the branch leading to *D. ananassae* and the branch leading to the *melanogaster* subgroup. Despite the similar number of SC cells in *D. ananassae* and the *melanogaster* subgroup, there is evidence of qualitative differences in their spatial distribution in the gland. *D. ananassae* differs from the three *melanogaster* subgroup species in that the SC are not restricted to the distal tip of the gland. Instead they appear to be roughly homogeneously distributed throughout the distal half of the gland (Fig 3).

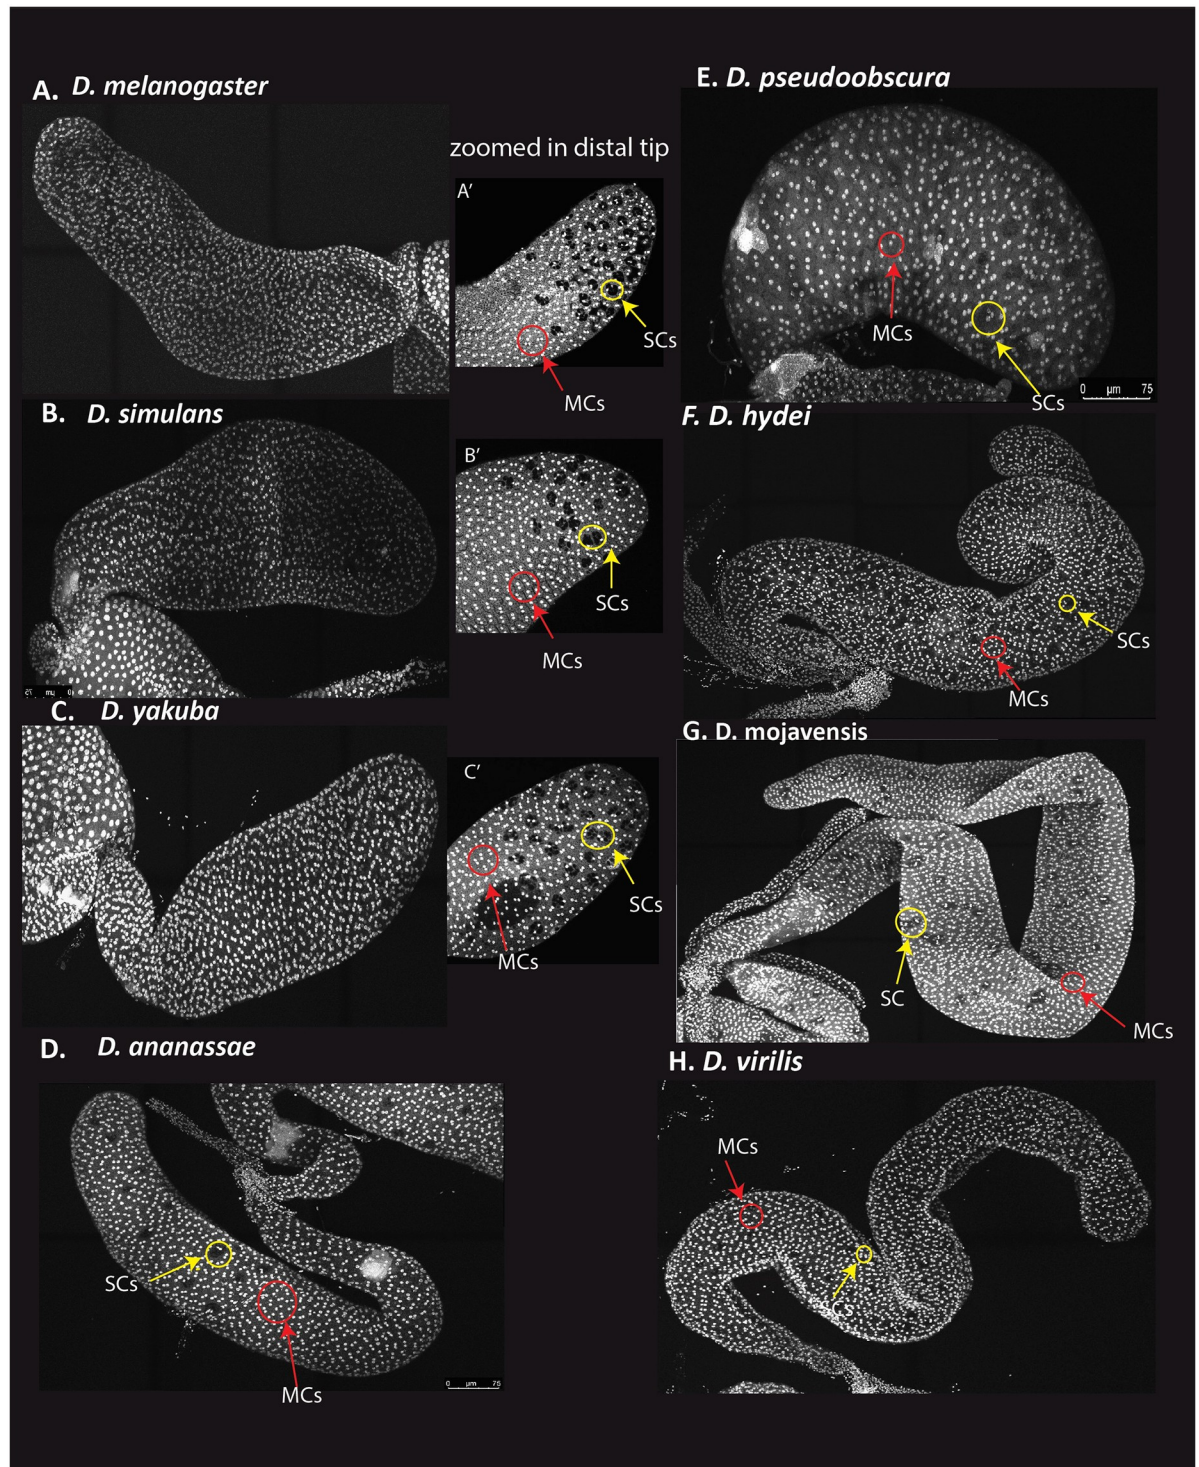

**Fig 3. Confocal images of representative AGs for eight *Drosophila* species.** (A-C) Accessory glands imaged at 40X, tilescan with 10% overlap, max projection confocal images of *D. melanogaster*, *D. simulans*, *D. yakuba*. (A' - C') is a 40X image of the distal tip of those species. (D-H) are 40X tilescan images, 10% overlap, max projection confocal images of (D) *D. ananassae*, (E) *D. pseudoobscura*, (F) *D. hydei*, (G) *D. mojavensis*, (H) *D. virilis*.

<https://doi.org/10.1371/journal.pone.0278811.g003>

**Table 1. Mean (SD) area and length of AG in microns.**

| Species (# glands)             | Area            | Length    |
|--------------------------------|-----------------|-----------|
| <i>D. melanogaster</i> (n = 9) | 129476 (24130)  | 801(90)   |
| <i>D. hydei</i> (n = 7)        | 514505 (633262) | 2017(854) |

<https://doi.org/10.1371/journal.pone.0278811.t001>

*D. pseudoobscura*, our only representative of the *obscura* group, is sister to the *melanogaster* group. It exhibits fewer SC than any *melanogaster* subgroup species, though the difference is not significant. Much like the *melanogaster* subgroup, the secondary cells are enriched in the distal tip of the gland. The *D. pseudoobscura* accessory gland was clearly shorter and about the same width (mean length and width, 546 microns and 191 microns, respectively) compared to the *melanogaster* subgroup (mean length and width, 1426 microns and 189 microns, respectively).

*D. hydei* and *D. mojavensis*, sister species in our sample, belong to the *repleta* group, a diverse clade of primarily cactophilic flies that originated about 20–30 MYA, most likely in South America [60, 61]. The reproductive biology of these flies differs from several other *Drosophila* species in multiple ways. For example, *D. mojavensis* and *D. hydei* share high re-mating rates compared to most other *Drosophila* species, with *D. hydei* apparently having a particularly high rate [45]. *D. hydei* also has very long sperm and testis compared to most flies [62]. We observed that these two species have extraordinarily high numbers of SC per gland, roughly six times as many as observed in the *melanogaster* group (Fig 1). Given that the *D. hydei* gland is only about four times the size of *D. melanogaster* (Table 1), it appears that the species differences in SC number cannot be explained solely by gland size variation, which is driven primarily by gland length differences. Supporting this conclusion, in striking contrast to the *melanogaster* group, *repleta* group flies exhibit SC distributed homogeneously throughout the gland (Fig 3). Interestingly, the *repleta* group appears to have lost the sex-peptide gene [63, 64], which codes for a protein critical for proper sperm use in *D. melanogaster* [65]. Whether the absence of sex-peptide, the increase in number of SC, and the homogeneous physical distribution of SC in the AG in the *repleta* group are functionally related is an interesting question.

*D. virilis*, which is sister to the *repleta* group (Fig 1), also exhibits substantially greater numbers of SC than the *Sophophora* species, though many fewer than *repleta* group flies (Fig 4). Thus, data from the sampled taxa are suggestive of greater numbers of SC per gland for the *Drosophila* group than for the *Sophophora* group (Fig 1), though additional sampling would be required to be confident of this inference. Similar to the *repleta* group species, *D. virilis* SC appear to be distributed homogeneously throughout the gland (Fig 3). In general, our data support the idea that restriction of the SC to the distal tip of the accessory gland in the *D. melanogaster* model system is a highly derived trait and not characteristic of most *Drosophila* lineages. The developmental basis of SC number and position, as well as their functional consequences and evolutionary processes driving divergence of these traits, are unknown.

## Conclusion

While phylogenetic comparative analysis of SC number and position in the accessory gland would be necessary to make strong, specific inferences on rates of phenotypic evolution of SC number on particular branches of the *Drosophila* phylogeny, the results reported here leave no doubt that SC number evolves quickly in the genus. Additionally, the physical distribution of SC in the gland also evolves, as most species do not appear to share the stereotypical clustering of SC in the tip of the gland seen in the *D. melanogaster* model. Further investigation of the

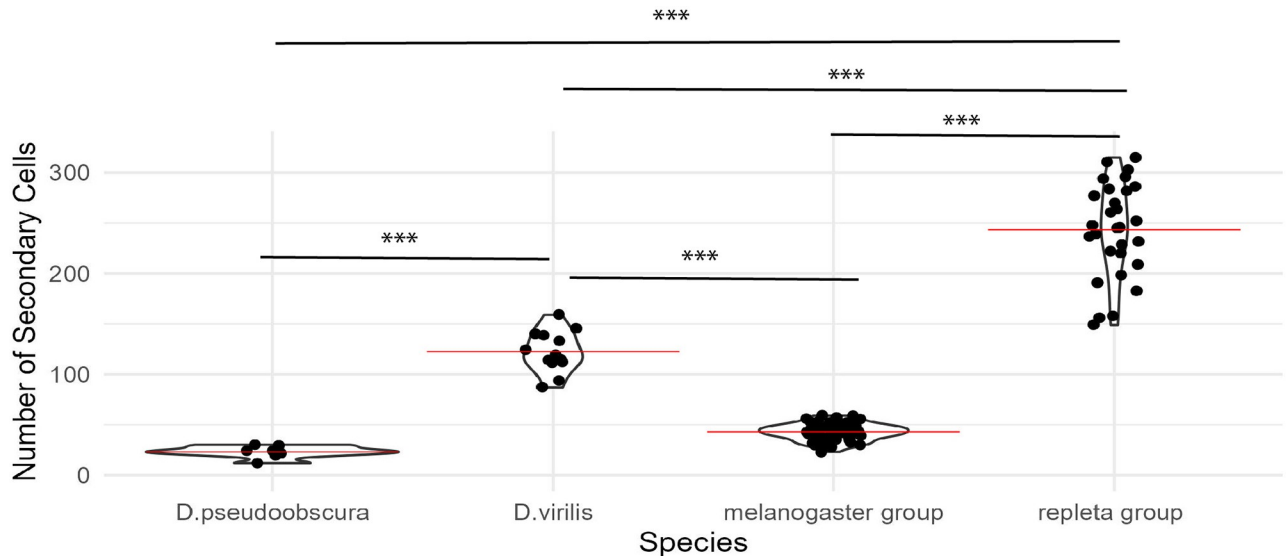

**Fig 4. Summary of SC number variation across *Drosophila* clades.** Violin plot showing the distribution of secondary cells among the *melanogaster*, *repleta*, *virilis*, and *pseudoobscura* groups. Red bars = mean number of secondary cells. Asterisks indicate significance p-values from ANOVA: \* = 0.05, \*\* = 0.01, \*\*\* = 0.001.

<https://doi.org/10.1371/journal.pone.0278811.g004>

patterns presented here promise to reveal new functional and evolutionary attributes of accessory gland diversification and its broader connections to mating system biology in the genus.

## Supporting information

**S1 Fig. Summary of SC number intraspecies.** A summary of the secondary cell numbers within the 3 RAL lines examined (517, 360, 390). Red bars = mean. (TIF)

## Acknowledgments

We thank Ben Hopkins, Juan Hurtado, the editor, and an anonymous reviewer for comments, Didem Sarikaya for microscopy and image analysis advice and feedback, Noelia Carrasquilla and Maria Florencia Ercoli for assistance with the confocal microscope, and the UC Davis Department of Plant Pathology for access to it. Kiichiro Taniguchi generously shared his propidium iodide staining protocol.

## Author Contributions

**Conceptualization:** Yoko A. Takashima, Alex C. Majane, David J. Begun.

**Data curation:** Yoko A. Takashima.

**Formal analysis:** Yoko A. Takashima.

**Funding acquisition:** David J. Begun.

**Investigation:** David J. Begun.

**Methodology:** Alex C. Majane, David J. Begun.

**Project administration:** David J. Begun.



**Resources:** David J. Begun.

**Supervision:** Alex C. Majane, David J. Begun.

**Validation:** Alex C. Majane, David J. Begun.

**Writing – original draft:** Yoko A. Takashima, Alex C. Majane, David J. Begun.

**Writing – review & editing:** Yoko A. Takashima, Alex C. Majane, David J. Begun.

## References

1. Wolfner MF. Precious essences: female secretions promote sperm storage in *Drosophila*. *PLoS Biol.* 2011; 9(11):e1001191. <https://doi.org/10.1371/journal.pbio.1001191> PMID: 22087072
2. Rice WR. Sexually antagonistic male adaptation triggered by experimental arrest of female evolution. *Nature.* 1996; 381(6579):232–4. <https://doi.org/10.1038/381232a0> PMID: 8622764
3. Holland B, Rice WR. Experimental removal of sexual selection reverses intersexual antagonistic coevolution and removes a reproductive load. *Proc Natl Acad Sci U S A.* 1999; 96(9):5083–8. <https://doi.org/10.1073/pnas.96.9.5083> PMID: 10220422
4. Lung O, Wolfner MF. *Drosophila* seminal fluid proteins enter the circulatory system of the mated female fly by crossing the posterior vaginal wall. *Insect Biochem Mol Biol.* 1999; 29(12):1043–52. [https://doi.org/10.1016/s0965-1748\(99\)00078-8](https://doi.org/10.1016/s0965-1748(99)00078-8) PMID: 10612039
5. Civetta A, Clark AG. Correlated effects of sperm competition and postmating female mortality. *Proc Natl Acad Sci U S A.* 2000; 97(24):13162–5. <https://doi.org/10.1073/pnas.230305397> PMID: 11078508
6. Fiumera AC, Dumont BL, Clark AG. Sperm competitive ability in *Drosophila melanogaster* associated with variation in male reproductive proteins. *Genetics.* 2005; 169(1):243–57. <https://doi.org/10.1534/genetics.104.032870> PMID: 15466425
7. Sirot LK, Wong A, Chapman T, Wolfner MF. Sexual conflict and seminal fluid proteins: a dynamic landscape of sexual interactions. *Cold Spring Harb Perspect Biol.* 2014; 7(2):a017533. <https://doi.org/10.1101/cshperspect.a017533> PMID: 25502515
8. Harshman LG, Prout T. Sperm Displacement without Sperm Transfer in *Drosophila Melanogaster*. *Evolution.* 1994; 48(3):758–66. <https://doi.org/10.1111/j.1558-5646.1994.tb01359.x> PMID: 28568282
9. Clark AG, Aguade M, Prout T, Harshman LG, Langley CH. Variation in sperm displacement and its association with accessory gland protein loci in *Drosophila melanogaster*. *Genetics* 1995; 139(1): 189–201.
10. Fiumera AC, Dumont BL, Clark AG. Associations between sperm competition and natural variation in male reproductive genes on the third chromosome of *Drosophila melanogaster*. *Genetics.* 2007; 176(2):1245–60. <https://doi.org/10.1534/genetics.106.064915> PMID: 17435238
11. Hollis B, Koppik M, Wensing KU, Ruhmann H, Genzoni E, Erkosar B, et al. Sexual conflict drives male manipulation of female postmating responses in *Drosophila melanogaster*. *Proc Natl Acad Sci U S A.* 2019; 116(17):8437–44. <https://doi.org/10.1073/pnas.1821386116> PMID: 30962372
12. Clark AG, Begun DJ. Female genotypes affect sperm displacement in *Drosophila*. *Genetics.* 1998; 149(3):1487–93. <https://doi.org/10.1093/genetics/149.3.1487> PMID: 9649536
13. Clark AG, Begun DJ, Prout T. Female x male interactions in *Drosophila* sperm competition. *Science.* 1999; 283(5399):217–20. <https://doi.org/10.1126/science.283.5399.217> PMID: 9880253
14. Giardina TJ, Beavis A, Clark AG, Fiumera AC. Female influence on pre- and post-copulatory sexual selection and its genetic basis in *Drosophila melanogaster*. *Mol Ecol.* 2011; 20(19):4098–108. <https://doi.org/10.1111/j.1365-294X.2011.05253.x> PMID: 21902747
15. Swanson WJ, Vacquier VD. The rapid evolution of reproductive proteins. *Nat Rev Genet.* 2002; 3(2):137–44. <https://doi.org/10.1038/nrg733> PMID: 11836507
16. Findlay GD, MacCoss MJ, Swanson WJ. Proteomic discovery of previously unannotated, rapidly evolving seminal fluid genes in *Drosophila*. *Genome Res.* 2009; 19(5):886–96. <https://doi.org/10.1101/gr.089391.108> PMID: 19411605
17. Coulthart MB, Singh RS. High level of divergence of male-reproductive-tract proteins, between *Drosophila melanogaster* and its sibling species, *D. simulans*. *Mol Biol Evol.* 1988; 5(2):182–91. <https://doi.org/10.1093/oxfordjournals.molbev.a040484> PMID: 3130539
18. Begun DJ, Whitley P, Todd BL, Waldrip-Dail HM, Clark AG. Molecular population genetics of male accessory gland proteins in *Drosophila*. *Genetics.* 2000; 156(4):1879–88. <https://doi.org/10.1093/genetics/156.4.1879> PMID: 11102381

19. Swanson WJ, Clark AG, Waldrip-Dail HM, Wolfner MF, Aquadro CF. Evolutionary EST analysis identifies rapidly evolving male reproductive proteins in *Drosophila*. *Proc Natl Acad Sci U S A*. 2001; 98(13):7375–9. <https://doi.org/10.1073/pnas.131568198> PMID: 11404480
20. Wagstaff BJ, Begun DJ. Molecular population genetics of accessory gland protein genes and testis-expressed genes in *Drosophila mojavensis* and *D. arizonae*. *Genetics*. 2005; 171(3):1083–101. <https://doi.org/10.1534/genetics.105.043372> PMID: 16085702
21. Haerty W, Jagadeeshan S, Kulathinal RJ, Wong A, Ravi Ram K, Sirot LK, et al. Evolution in the fast lane: rapidly evolving sex-related genes in *Drosophila*. *Genetics*. 2007; 177(3):1321–35. <https://doi.org/10.1534/genetics.107.078865> PMID: 18039869
22. Begun DJ, Lindfors HA. Rapid evolution of genomic Acp complement in the melanogaster subgroup of *Drosophila*. *Mol Biol Evol*. 2005; 22(10):2010–21. <https://doi.org/10.1093/molbev/msi201> PMID: 15987879
23. Ahmed-Braimah YH, Unckless RL, Clark AG. Evolutionary Dynamics of Male Reproductive Genes in the *Drosophila virilis* Subgroup. *G3 (Bethesda)*. 2017; 7(9):3145–55. <https://doi.org/10.1534/g3.117.1136> PMID: 28739599
24. Garlovsky MD, Evans C, Rosenow MA, Karr TL, Snook RR. Seminal fluid protein divergence among populations exhibiting postmating prezygotic reproductive isolation. *Mol Ecol*. 2020; 29(22):4428–41. <https://doi.org/10.1111/mec.15636> PMID: 32939895
25. Cridland JM, Contino CE, Begun DJ. Selection and Geography Shape Male Reproductive Tract Transcriptomes in *Drosophila Melanogaster*. *Genetics*. 2023. <https://doi.org/10.1093/genetics/iyad034> PMID: 36869688
26. Wagstaff BJ, Begun DJ. Comparative genomics of accessory gland protein genes in *Drosophila melanogaster* and *D. pseudoobscura*. *Mol Biol Evol*. 2005; 22(4):818–32. <https://doi.org/10.1093/molbev/msi067> PMID: 15601888
27. Mueller JL, Ravi Ram K, McGraw LA, Bloch Qazi MC, Siggia ED, Clark AG, et al. Cross-species comparison of *Drosophila* male accessory gland protein genes. *Genetics*. 2005; 171(1):131–43. <https://doi.org/10.1534/genetics.105.043844> PMID: 15944345
28. Begun DJ, Lindfors HA, Thompson ME, Holloway AK. Recently evolved genes identified from *Drosophila yakuba* and *D. erecta* accessory gland expressed sequence tags. *Genetics*. 2006; 172(3):1675–81. <https://doi.org/10.1534/genetics.105.050336> PMID: 16361246
29. Cridland JM, Majane AC, Sheehy HK, Begun DJ. Polymorphism and Divergence of Novel Gene Expression Patterns in *Drosophila melanogaster*. *Genetics*. 2020; 216(1):79–93. <https://doi.org/10.1534/genetics.120.303515> PMID: 32737121
30. Cridland JM, Majane AC, Zhao L, Begun DJ. Population biology of accessory gland-expressed de novo genes in *Drosophila melanogaster*. *Genetics*. 2022; 220(1). <https://doi.org/10.1093/genetics/iyab207> PMID: 34791207
31. Hurtado J, Almeida FC, Belliard SA, Revale S, Hasson E. Research gaps and new insights in the evolution of *Drosophila* seminal fluid proteins. *Insect Mol Biol*. 2022; 31(2):139–58. <https://doi.org/10.1111/imb.12746> PMID: 34747062
32. Taniguchi K, Kokuryo A, Imano T, Minami R, Nakagoshi H, Adashi-Yamada T. Bi-nucleation of the *Drosophila* adult male accessory gland cells increases plasticity of organ size for effective reproduction. *Biological Systems Open Access* 2012; 1(1). <https://doi.org/10.4172/2329-6577.1000e101>
33. Manning A. The control of sexual receptivity in female *Drosophila*. *Anim Behav*. 1967; 15(2):239–50. [https://doi.org/10.1016/0003-3472\(67\)90006-1](https://doi.org/10.1016/0003-3472(67)90006-1) PMID: 6030948
34. Kalb JM, DiBenedetto AJ, Wolfner MF. Probing the function of *Drosophila melanogaster* accessory glands by directed cell ablation. *Proc Natl Acad Sci U S A*. 1993; 90(17):8093–7. <https://doi.org/10.1073/pnas.90.17.8093> PMID: 8367469
35. Xue L, Noll M. *Drosophila* female sexual behavior induced by sterile males showing copulation complementation. *Proc Natl Acad Sci U S A*. 2000; 97(7):3272–5. <https://doi.org/10.1073/pnas.97.7.3272> PMID: 10725377
36. Neubaum DM, Wolfner MF. Mated *Drosophila melanogaster* females require a protein, Acp36DE, to store sperm efficiently. *Genetics* 1999; 153(2): 845–857.
37. Ram KR, Wolfner MF. Sustained post-mating response in *Drosophila melanogaster* requires multiple seminal fluid proteins. *PLoS Genet*. 2007; 3(12):e238. <https://doi.org/10.1371/journal.pgen.0030238> PMID: 18085830
38. Ram KR, Wolfner MF. A network of interactions among seminal proteins underlies the long-term post-mating response in *Drosophila*. *Proc Natl Acad Sci U S A*. 2009; 106(36):15384–9. <https://doi.org/10.1073/pnas.0902923106> PMID: 19706411

39. Wilson C, Leiblich A, Goberdhan DC, Hamdy F. The *Drosophila* Accessory Gland as a Model for Prostate Cancer and Other Pathologies. *Curr Top Dev Biol*. 2017; 121:339–75. <https://doi.org/10.1016/bs.ctdb.2016.06.001> PMID: 28057306
40. Sitnik JL, Gligorov D, Maeda RK, Karch F, Wolfner MF. The Female Post-Mating Response Requires Genes Expressed in the Secondary Cells of the Male Accessory Gland in *Drosophila melanogaster*. *Genetics*. 2016; 202(3):1029–41. <https://doi.org/10.1534/genetics.115.181644> PMID: 26746709
41. Hopkins BR, Sepil I, Bonham S, Miller T, Charles PD, Fischer R, et al. BMP signaling inhibition in *Drosophila* secondary cells remodels the seminal proteome and self and rival ejaculate functions. *Proc Natl Acad Sci U S A*. 2019; 116(49):24719–28. <https://doi.org/10.1073/pnas.1914491116> PMID: 31740617
42. Corrigan L, Redhai S, Leiblich A, Fan SJ, Perera SM, Patel R, et al. BMP-regulated exosomes from *Drosophila* male reproductive glands reprogram female behavior. *J Cell Biol*. 2014; 206(5):671–88. <https://doi.org/10.1083/jcb.201401072> PMID: 25154396
43. Immarigeon C, Frei Y, Sofie Y, Delbare N, Gligorov D, Machado Almeida P, et al. Identification of a micropeptide and multiple secondary cell genes that modulate *Drosophila* male reproductive success. *Proceedings of the National Academy of Sciences of the United States of America* 2021; 118 (15). <https://doi.org/10.1073/pnas.2001897118> PMID: 33876742
44. Majane AC, Cridland JM, Begun DJ. Single-nucleus transcriptomes reveal evolutionary and functional properties of cell types in the *Drosophila* accessory gland. *Genetics*. 2022; 220(2). <https://doi.org/10.1093/genetics/iyab213> PMID: 34849871
45. Markow TA. Evolution of *Drosophila* Mating Systems. In *Evolutionary Biology*. Ed. Hecht Max K. Plenum Press, NY;1996.
46. Mackay TF, Richards S, Stone EA, Barbadilla A, Ayroles JF, Zhu D, et al. The *Drosophila melanogaster* Genetic Reference Panel. *Nature*. 2012; 482(7384):173–8. <https://doi.org/10.1038/nature10811> PMID: 22318601
47. Begun DJ, Holloway AK, Stevens K, Hillier LW, Poh YP, Hahn MW, et al. Population genomics: whole-genome analysis of polymorphism and divergence in *Drosophila simulans*. *PLoS Biol*. 2007; 5(11):e310. <https://doi.org/10.1371/journal.pbio.0050310> PMID: 17988176
48. Powell JR. *Progress and Progress in Evolutionary Biology: The Drosophila Model*. Oxford University Press;1997.
49. Tamura K, Subramanian S, Kumar S. Temporal patterns of fruit fly (*Drosophila*) evolution revealed by mutation clocks. *Mol Biol Evol*. 2004; 21(1):36–44. <https://doi.org/10.1093/molbev/msg236> PMID: 12949132
50. Obbard DJ, Maclennan J, Kim KW, Rambaut A, O'Grady PM, Jiggins FM. Estimating divergence dates and substitution rates in the *Drosophila* phylogeny. *Mol Biol Evol*. 2012; 29(11):3459–73. <https://doi.org/10.1093/molbev/mss150> PMID: 22683811
51. Preibisch S, Saalfeld S, Tomancak P. Globally optimal stitching of tiled 3D microscopic image acquisitions. *Bioinformatics*. 2009; 25(11):1463–5. <https://doi.org/10.1093/bioinformatics/btp184> PMID: 19346324
52. Schindelin J, Arganda-Carreras I, Frise E, Kaynig V, Longair M, Pietzsch T, et al. Fiji: an open-source platform for biological-image analysis. *Nat Methods*. 2012; 9(7):676–82. <https://doi.org/10.1038/nmeth.2019> PMID: 22743772
53. Bangham J., Chapman T., & Partridge L. Effects of body size, accessory gland and testis size on pre- and postcopulatory success in *Drosophila melanogaster*. *Animal Behaviour*. 2002; 64(6), 915–921.
54. Baker RH, Denniff M, Futerman P, Fowler K, Pomiankowski A, Chapman T. Accessory gland size influences time to sexual maturity and mating frequency in the stalk-eyed fly, *Cyrtodiopsis dalmanni*. *Behavioral Ecology*. 2003; 14(5):607–11.
55. R Core Team (2022). R: A language and environment for statistical computing. R Foundation for Statistical Computing, Vienna, Austria. URL <https://www.R-project.org/>.
56. Hothorn T, Bretz F, Westfall P. Simultaneous inference in general parametric models. *Biom J*. 2008; 50(3):346–63. <https://doi.org/10.1002/bimj.200810425> PMID: 18481363
57. Wickham H. *ggplot2: Elegant Graphics for Data Analysis*. Springer-Verlag New York, 2016.
58. Paradis E, Schliep K. *ape 5.0: an environment for modern phylogenetics and evolutionary analyses in R*. *Bioinformatics*. 2018; 35(3):526–8.
59. Bertram MJ, Akerkar GA, Ard RL, Gonzalez C, Wolfner MF. Cell type-specific gene expression in the *Drosophila melanogaster* male accessory gland. *Mech Dev*. 1992; 38(1):33–40. [https://doi.org/10.1016/0925-4773\(92\)90036-j](https://doi.org/10.1016/0925-4773(92)90036-j) PMID: 1525037
60. Patterson JT, Stone WS. *Evolution in the Genus Drosophila*. Macmillan;1952.

61. Oliveira DC, Almeida FC, O'Grady PM, Armella MA, DeSalle R, Etges WJ. Monophyly, divergence times, and evolution of host plant use inferred from a revised phylogeny of the *Drosophila* repleta species group. *Mol Phylogenet Evol.* 2012; 64(3):533–44. <https://doi.org/10.1016/j.ympev.2012.05.012> PMID: 22634936
62. Pitnick S, Markow TA. Large-male advantages associated with costs of sperm production in *Drosophila* hydei, a species with giant sperm. *Proc Natl Acad Sci U S A.* 1994; 91(20):9277–81. <https://doi.org/10.1073/pnas.91.20.9277> PMID: 7937755
63. McGeary MK, Findlay GD. Molecular evolution of the sex peptide network in *Drosophila*. *J Evol Biol.* 2020; 33(5):629–41. <https://doi.org/10.1111/jeb.13597> PMID: 31991034
64. Hopkins BR, Perry JC. The evolution of sex peptide: sexual conflict, cooperation, and coevolution. *Biological Reviews.* 2022; 97(4):1426–48. <https://doi.org/10.1111/brv.12849> PMID: 35249265
65. Chen PS, Stumm-Zollinger E, Aigaki T, Balmer J, Bienz M, Bohlen P. A male accessory gland peptide that regulates reproductive behavior of female *D. melanogaster*. *Cell.* 1988; 54(3):291–8. [https://doi.org/10.1016/0092-8674\(88\)90192-4](https://doi.org/10.1016/0092-8674(88)90192-4) PMID: 3135120
